# Supplementary material
Source: Springer Nature journal article supplement (https://www.springermedizin.de/resource/supplementary/12887_2013_971_MOESM2_ESM.pdf/9476812)
Supplement: MOESM2 [file 9476812]

| Section / Item                | Synthesis version                                                                                                                                                    |                                                                                                                                                                                    | Pre-final version                                                                                                                                             |                                                                                                                                                                                       | Final version                                                                                                                              |                                                                                                                      |
|-------------------------------|----------------------------------------------------------------------------------------------------------------------------------------------------------------------|------------------------------------------------------------------------------------------------------------------------------------------------------------------------------------|---------------------------------------------------------------------------------------------------------------------------------------------------------------|---------------------------------------------------------------------------------------------------------------------------------------------------------------------------------------|--------------------------------------------------------------------------------------------------------------------------------------------|----------------------------------------------------------------------------------------------------------------------|
|                               | Discussion                                                                                                                                                           | Consensus                                                                                                                                                                          | Discussion                                                                                                                                                    | Consensus                                                                                                                                                                             | Discussion                                                                                                                                 | Consensus                                                                                                            |
| <b>Title</b>                  | <ul style="list-style-type: none"> <li>Symbol &amp;</li> <li><i>Infantil</i></li> <li><i>Convivendo com deficiência</i></li> </ul>                                   | <ul style="list-style-type: none"> <li>Substituted for <i>e</i></li> <li><i>Infantil</i> was removed</li> <li>Changed to <i>criança com deficiências</i></li> </ul>                | <ul style="list-style-type: none"> <li>Inclusion of the term <i>convivendo com deficiências</i></li> </ul>                                                    | <ul style="list-style-type: none"> <li>The T1 original translation was maintained</li> </ul>                                                                                          |                                                                                                                                            |                                                                                                                      |
| -                             |                                                                                                                                                                      |                                                                                                                                                                                    |                                                                                                                                                               |                                                                                                                                                                                       | <ul style="list-style-type: none"> <li><i>Formulário</i></li> </ul>                                                                        | <ul style="list-style-type: none"> <li><i>Questionário</i></li> </ul>                                                |
| <b>Instruction / 1</b>        | <ul style="list-style-type: none"> <li>your child's health</li> </ul>                                                                                                | <ul style="list-style-type: none"> <li>Changed to <i>seu filho(a)</i></li> </ul>                                                                                                   |                                                                                                                                                               |                                                                                                                                                                                       |                                                                                                                                            |                                                                                                                      |
| <b>Instruction / 2</b>        | <ul style="list-style-type: none"> <li><i>Leia atentamente ou cuidadosamente</i></li> </ul>                                                                          | <ul style="list-style-type: none"> <li><i>Leia as instruções com atenção</i></li> </ul>                                                                                            | <ul style="list-style-type: none"> <li>Use of the term <i>por favor</i></li> </ul>                                                                            | <ul style="list-style-type: none"> <li>The term was removed</li> </ul>                                                                                                                |                                                                                                                                            |                                                                                                                      |
| <b>Instruction / Example</b>  | <ul style="list-style-type: none"> <li>Level of assistance</li> <li>Minimal supervised</li> <li>Putting on/wearing footwear? (socks, shoes, braces, etc.)</li> </ul> | <ul style="list-style-type: none"> <li><i>Nível de Ajuda</i></li> <li><i>Mínimo ou Supervisionado</i></li> <li><i>Colocar meias, sapatos, aparelho ortopédico, etc.</i></li> </ul> |                                                                                                                                                               |                                                                                                                                                                                       |                                                                                                                                            |                                                                                                                      |
| <b>1 / 1</b>                  |                                                                                                                                                                      |                                                                                                                                                                                    | <ul style="list-style-type: none"> <li><i>Da maneira como isso normalmente é feito</i></li> </ul>                                                             | <ul style="list-style-type: none"> <li>Substituted for <i>da maneira usual</i></li> </ul>                                                                                             | <ul style="list-style-type: none"> <li>The phrase: <i>comer/beber ou ser alimentado?</i></li> </ul>                                        | <ul style="list-style-type: none"> <li><i>Alimentar seu filho(a)?</i></li> </ul>                                     |
| <b>1 / 3</b>                  | <ul style="list-style-type: none"> <li>bathing/washing</li> </ul>                                                                                                    | <ul style="list-style-type: none"> <li><i>Tomar banho</i></li> </ul>                                                                                                               | <ul style="list-style-type: none"> <li>bathing/washing</li> </ul>                                                                                             | <ul style="list-style-type: none"> <li><i>banhar/lavar</i> was maintained</li> </ul>                                                                                                  | <ul style="list-style-type: none"> <li>bathing/washing</li> </ul>                                                                          | <ul style="list-style-type: none"> <li><i>banhar/lavar</i> was maintained</li> </ul>                                 |
| <b>1 / 7</b>                  | <ul style="list-style-type: none"> <li><i>Desvestir-se</i></li> </ul>                                                                                                | <ul style="list-style-type: none"> <li>Changed to <i>tirar roupas</i></li> </ul>                                                                                                   |                                                                                                                                                               |                                                                                                                                                                                       |                                                                                                                                            |                                                                                                                      |
| <b>2 / 10</b>                 |                                                                                                                                                                      |                                                                                                                                                                                    | <ul style="list-style-type: none"> <li><i>Deitar-se ou levantar-se da cama</i></li> </ul>                                                                     | <ul style="list-style-type: none"> <li><i>Deitar e levantar da cama</i></li> </ul>                                                                                                    |                                                                                                                                            |                                                                                                                      |
| <b>2 / 11</b>                 | <ul style="list-style-type: none"> <li>Transferring into/out of a wheelchair/chair?</li> </ul>                                                                       | <ul style="list-style-type: none"> <li><i>Transferir-se para ou de uma cadeira de rodas ou cadeira</i></li> </ul>                                                                  |                                                                                                                                                               |                                                                                                                                                                                       |                                                                                                                                            |                                                                                                                      |
| <b>2 / 12</b>                 |                                                                                                                                                                      |                                                                                                                                                                                    |                                                                                                                                                               |                                                                                                                                                                                       | <ul style="list-style-type: none"> <li><i>Sentar</i></li> </ul>                                                                            | <ul style="list-style-type: none"> <li><i>Permanecer sentado(a)</i></li> </ul>                                       |
| <b>2 / 13</b>                 |                                                                                                                                                                      |                                                                                                                                                                                    | <ul style="list-style-type: none"> <li>Standing up</li> </ul>                                                                                                 | <ul style="list-style-type: none"> <li>Changed to <i>em pé</i></li> </ul>                                                                                                             |                                                                                                                                            |                                                                                                                      |
| <b>2 / 14 and 15</b>          |                                                                                                                                                                      |                                                                                                                                                                                    |                                                                                                                                                               |                                                                                                                                                                                       | <ul style="list-style-type: none"> <li><i>Movimentar-se</i></li> </ul>                                                                     | <ul style="list-style-type: none"> <li><i>Locomover-se</i></li> </ul>                                                |
| <b>2 / 17</b>                 | <ul style="list-style-type: none"> <li>Sightseeing</li> </ul>                                                                                                        | <ul style="list-style-type: none"> <li><i>Excursões</i></li> </ul>                                                                                                                 |                                                                                                                                                               |                                                                                                                                                                                       |                                                                                                                                            |                                                                                                                      |
| <b>3 / -</b>                  |                                                                                                                                                                      |                                                                                                                                                                                    | <ul style="list-style-type: none"> <li><i>Forte</i> in the T12 version generated the term strong and not severe as in the original</li> </ul>                 | <ul style="list-style-type: none"> <li>The term <i>intensidade</i> was altered to <i>grau</i> and the terms <i>forte</i> to <i>intenso</i> and <i>fraca</i> to <i>leve</i></li> </ul> | <ul style="list-style-type: none"> <li>Inclusion of a statement</li> </ul>                                                                 | <ul style="list-style-type: none"> <li>Insert the statement</li> </ul>                                               |
| <b>4 / 32</b>                 |                                                                                                                                                                      |                                                                                                                                                                                    |                                                                                                                                                               |                                                                                                                                                                                       | <ul style="list-style-type: none"> <li>Inclusion of the word <i>alfabetização</i></li> </ul>                                               | <ul style="list-style-type: none"> <li>Include the word <i>alfabetização</i></li> </ul>                              |
| <b>5 / 3</b>                  |                                                                                                                                                                      |                                                                                                                                                                                    | <ul style="list-style-type: none"> <li><i>Ruim</i> and <i>muito ruim</i> generated the term bad and very bad and not poor and very poor</li> </ul>            | <ul style="list-style-type: none"> <li>Maintain the original translation</li> </ul>                                                                                                   |                                                                                                                                            |                                                                                                                      |
| <b>5 / 34</b>                 |                                                                                                                                                                      |                                                                                                                                                                                    |                                                                                                                                                               |                                                                                                                                                                                       | <ul style="list-style-type: none"> <li><i>Internado &gt; 7 dias</i></li> <li><i>Internado &lt; 7 dias</i></li> </ul>                       | <ul style="list-style-type: none"> <li><i>Ficou internado menos que/por mais de uma semana</i></li> </ul>            |
| <b>7 / -</b>                  |                                                                                                                                                                      |                                                                                                                                                                                    |                                                                                                                                                               |                                                                                                                                                                                       | <ul style="list-style-type: none"> <li>The option: <i>razoavelmente importante</i></li> <li>The option: <i>muito importante</i></li> </ul> | <ul style="list-style-type: none"> <li><i>Mais ou menos importante</i></li> <li><i>Importante</i></li> </ul>         |
| <b>7 / 4</b>                  |                                                                                                                                                                      |                                                                                                                                                                                    |                                                                                                                                                               |                                                                                                                                                                                       | <ul style="list-style-type: none"> <li>The phrase: <i>Usar o banheiro ou higiene</i></li> </ul>                                            | <ul style="list-style-type: none"> <li><i>Usar o banheiro ou fazer a higiene</i></li> </ul>                          |
| <b>7 / 12</b>                 |                                                                                                                                                                      |                                                                                                                                                                                    |                                                                                                                                                               |                                                                                                                                                                                       | <ul style="list-style-type: none"> <li>The word: <i>Sentar</i></li> </ul>                                                                  | <ul style="list-style-type: none"> <li><i>Permanecer sentado(a)</i></li> </ul>                                       |
| <b>7 / 17 e 15</b>            |                                                                                                                                                                      |                                                                                                                                                                                    |                                                                                                                                                               |                                                                                                                                                                                       | <ul style="list-style-type: none"> <li>The word: <i>Movimentar-se</i></li> </ul>                                                           | <ul style="list-style-type: none"> <li><i>Locomover-se</i></li> </ul>                                                |
| <b>7 / 32</b>                 |                                                                                                                                                                      |                                                                                                                                                                                    |                                                                                                                                                               |                                                                                                                                                                                       | <ul style="list-style-type: none"> <li>Inclusion of the word <i>alfabetização</i></li> </ul>                                               | <ul style="list-style-type: none"> <li>Include the word <i>alfabetização</i></li> </ul>                              |
| <b>8 / 1</b>                  |                                                                                                                                                                      |                                                                                                                                                                                    | <ul style="list-style-type: none"> <li><i>Sexo da criança</i></li> </ul>                                                                                      | <ul style="list-style-type: none"> <li>The term was maintained</li> </ul>                                                                                                             |                                                                                                                                            |                                                                                                                      |
| <b>8 / Level of schooling</b> | <ul style="list-style-type: none"> <li>Impossible to achieve consensus due to different criteria</li> </ul>                                                          | <ul style="list-style-type: none"> <li><i>MEC scale</i></li> </ul>                                                                                                                 |                                                                                                                                                               |                                                                                                                                                                                       |                                                                                                                                            |                                                                                                                      |
| <b>9 / 3</b>                  |                                                                                                                                                                      |                                                                                                                                                                                    | <ul style="list-style-type: none"> <li><i>Trabalhando fora em tempo integral ou meio período, ou trabalhando em casa (negócio montado em casa)</i></li> </ul> | <ul style="list-style-type: none"> <li><i>Trabalhando em tempo integral ou meio período, em casa ou fora</i></li> </ul>                                                               | <ul style="list-style-type: none"> <li><i>Trabalhando em tempo integral ou meio período, em casa ou fora</i></li> </ul>                    | <ul style="list-style-type: none"> <li><i>Trabalho em tempo integral ou meio período, em casa ou fora</i></li> </ul> |
| <b>Final question</b>         | <ul style="list-style-type: none"> <li>in units of time</li> </ul>                                                                                                   | <ul style="list-style-type: none"> <li><i>em minutos</i></li> </ul>                                                                                                                |                                                                                                                                                               |                                                                                                                                                                                       |                                                                                                                                            |                                                                                                                      |
| -                             |                                                                                                                                                                      |                                                                                                                                                                                    |                                                                                                                                                               |                                                                                                                                                                                       | <ul style="list-style-type: none"> <li><i>Nível de auxílio</i></li> </ul>                                                                  | <ul style="list-style-type: none"> <li>Substituted for <i>nível de ajuda</i></li> </ul>                              |
| -                             |                                                                                                                                                                      |                                                                                                                                                                                    |                                                                                                                                                               |                                                                                                                                                                                       | <ul style="list-style-type: none"> <li><i>Moderado</i></li> </ul>                                                                          | <ul style="list-style-type: none"> <li>Substitute for <i>médio</i></li> </ul>                                        |
